# Supplementary material for: Fast acid-leaching strategy treated hollow cobalt–carbon materials as highly efficient electrochemical catalysts for Zn–air batteries
Source: Royal Society of Chemistry journal article supplement (doi:10.1039/d1qm01293b), 2021-11-30
Supplement: d1qm01293b1.pdf [file d1qm01293b1.pdf]

## Supporting Information

### **Fast acid-leaching strategy treated hollow cobalt-carbon materials as high-efficient electrochemical catalysts for Zn-air batteries**

Jun Yang<sup>a</sup>, Jilan Long<sup>a,\*</sup>, Cheng Chen<sup>a</sup>, Guangming Liang<sup>a</sup>, Bing Tang<sup>a</sup>, Xiaohong Liu<sup>b</sup> and Wei Zhang<sup>c,\*</sup>

<sup>a</sup> Chemical Synthesis and Pollution Control Key Laboratory of Sichuan Province, College of Chemistry and Chemical Engineering, China West Normal University, Nanchong, 637000, PR China.

<sup>b</sup> National University of Singapore (Chongqing) Research Institute, Chongqing 401123, P.R. China

<sup>c</sup> Chongqing Institute of Green and Intelligent Technology, Chinese Academy of Sciences, Chongqing 400714, P. R. China

\* Corresponding authors, e-mail: xlong612@126.com (J. Long);

andyzhangwei@163.com (W. Zhang).

## Contents

### **1. Experimental section**

### **2. Characterization**

### **3. Experimental results**

## **1. Experimental section**

### **1.1 Electrochemical measurement for ORR and OER**

The electrochemical performances of all catalysts were tested on a computer-controlled bipotentiostat (Princeton, PARSTAT 3000A-DX, USA) with three electrode systems with Pt/C as counter electrode, AgCl (for ORR) or Hg/HgO (for OER) catalysts as reference electrode, catalysts modified glassy carbon electrode (GCE) as work electrode. The synthetic procedure of work electrode is as follows: generally, 5mg catalyst was dispersed into 1 mL of EtOH-0.5wt% Nafion (v:v=9:1) solution and treated by ultrasonic processing. Then the polished glassy carbon electrode (GCE, diameter=5 mm) was modified by 10 uL of the catalysts ink to obtain a loading mass of 0.254 mg/cm<sup>2</sup>. The CV and LSV tests were carried out in 0.1 M KOH with the scanning rate of 100 mV/s and 10 mV/s, respectively. After to test, all potentials were converted into reversible hydrogen electrode (RHE) according to the Nernst equation.

### **1.2 The assembly of liquid Zn-air battery**

The liquid Zn-air battery is assembled with catalysts modified carbon paper as air cathode, Zn plates as anode, O<sub>2</sub>-saturated 6M KOH as electrolyte. All of these components are fixed by a sealed battery model, while the cycling of electrolyte depends on a circulating pump connected with the sealed battery model. The synthetic procedure is as follows: in general, catalyst was dispersed into 300 uL of EtOH-nafion solution and treated by ultrasonic processing, then the catalysts ink were dipped onto the composite carbon paper (carbon paper+waterproof membrane+

conducting layer) to obtain a mass loading of 1 mg/cm<sup>2</sup> as air cathode catalysts.

### **1.3 The assembly of solid-state button Zn-air battery**

The solid-state ZABs are assembled with catalysts modified carbon paper as air cathode, commercial Zn plate as anode, and PANa-KOH (sodium polyacrylate/6 M KOH; sodium polyacrylate purchases from Aladdin company) as electrolyte. The air cathode catalysts were prepared for the similar procedure of liquid ZABs, and the mass loading into catalysts was 1 mg/cm<sup>2</sup>. Open circuit voltage, polarization curves, galvanostatic discharge curves and charge-discharge cycle curves were tested on the electrochemical workstation (Princeton, PARSTAT 3000A-DX, USA). As contrast, Pt/C-RuO<sub>2</sub>(mass ratio 1:1) was also tested for the same conditions.

## **2. Characterization**

The SEM and elemental mapping of Co@CN-P<sub>10</sub>-750 catalysts and corresponding elements distribution were investigated with a scanning electron microscope (Zeiss, Gemini SEM 500). PXRD patterns of Co@CN-P<sub>10</sub>-T catalysts were tested by a Rigaku diffractometer (Ultimal V, 3 kW) with Cu K $\alpha$  radiation (40 kV, 40 mA, 0.1543 nm). The Raman spectra were tested on the confocal microraman spectrometer (Witec alpha300 access, Germany). The XPS spectra of C, Co, N, S elements were measured on the X-ray photoelectron spectroscopy (XPS, Thermo Scientific ESCALAB 250Xi). The metal particles and morphology of the Co@CN-P<sub>10</sub>-750 and Co@CN-P<sub>10</sub>-750-H<sup>+</sup>(12h) catalysts were determined by a transmission electron microscope (TEM, JEOL, JEM-2010HR). The CV and LSV were measured

on the computer controlled electrochemical workstation (Princeton, PARSTAT 3000A-DX, USA) with a rotating disk electrode (Pine). The liquid and solid-state ZABs were also tested on the instrument of PARSTAT 3000A-DX.

### 3. Experimental results

Table S1. Chemical compositions of samples obtained from XPS results.

|                            | P<br>(atom%) | C<br>(atom%) | N<br>(atom%) | O<br>(atom%) | Co<br>(atom%) |
|----------------------------|--------------|--------------|--------------|--------------|---------------|
| Co@CN-P <sub>10</sub> -700 | 0.88         | 74.5         | 6.52         | 14.35        | 3.75          |
| Co@CN-P <sub>10</sub> -750 | 0.82         | 77.06        | 5.71         | 13.06        | 3.35          |
| Co@CN-P <sub>10</sub> -800 | 0.63         | 80.24        | 4.39         | 10.02        | 4.72          |
| Co@CN-P <sub>10</sub> -850 | 0.52         | 81.61        | 4.02         | 8.02         | 5.83          |
| Co@CN-P <sub>10</sub> -900 | 0.25         | 84.97        | 2.89         | 5.24         | 6.65          |

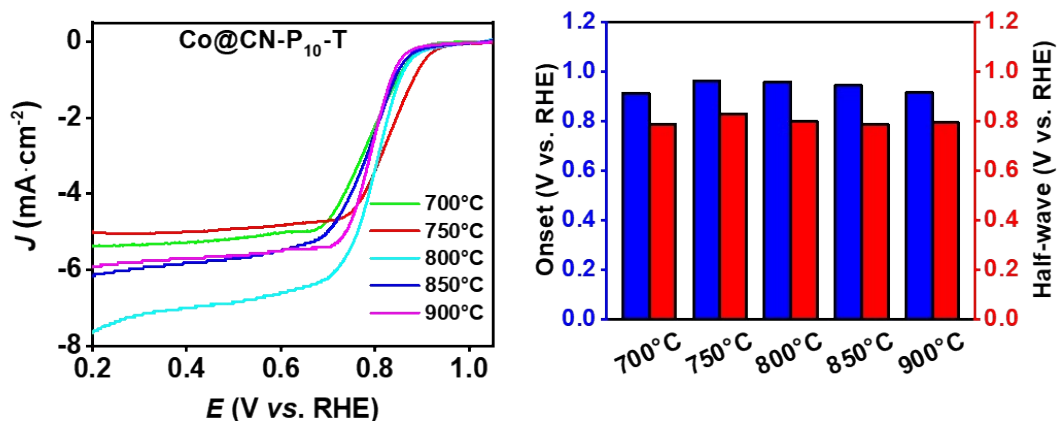

**Fig. S1.** (a) ORR performance of Co@CN-P<sub>10</sub> catalysts synthesized at different temperatures and (b) their performances comparison diagram.

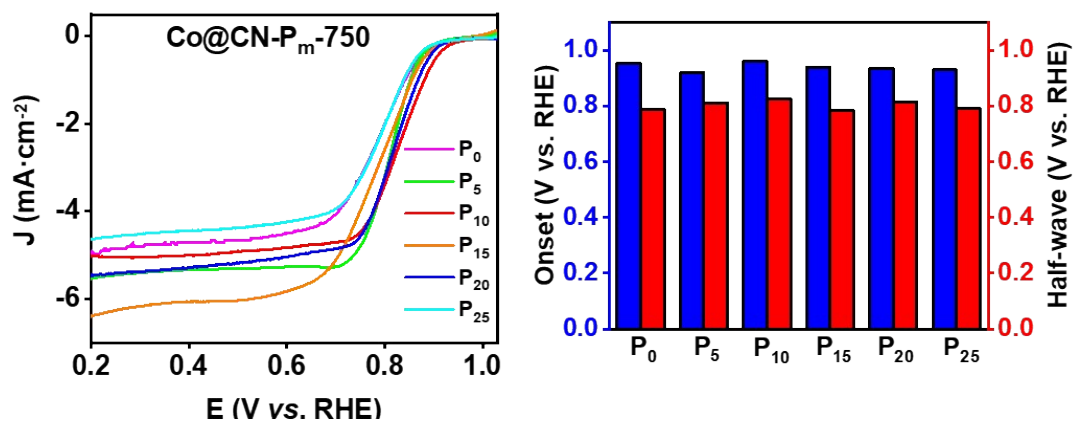

**Fig. S2.** (a) ORR performance of Co@CN-P<sub>m</sub>-750 catalysts synthesized at 750 °C with different P contents in their template and (b) their performances comparison diagram.

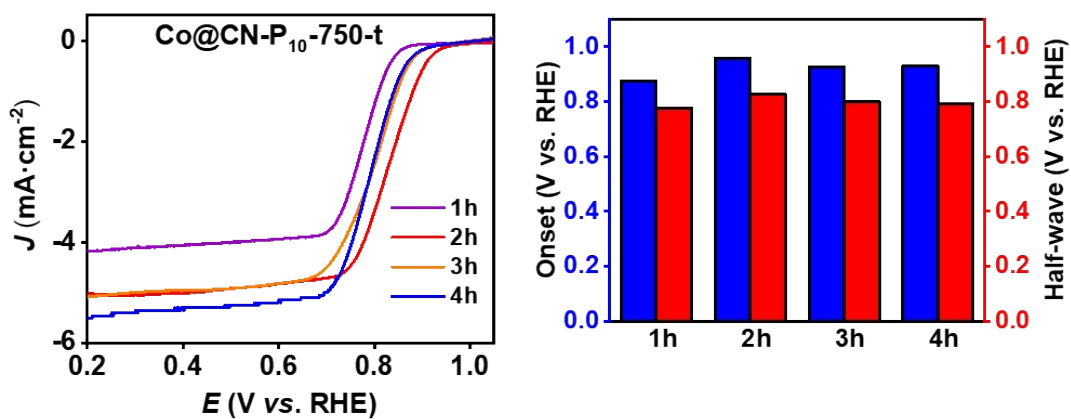

**Fig. S3.** (a) ORR performance of Co@CN-P<sub>10</sub>-750 catalysts synthesized with various calcining time and (b) their performances comparison diagram.

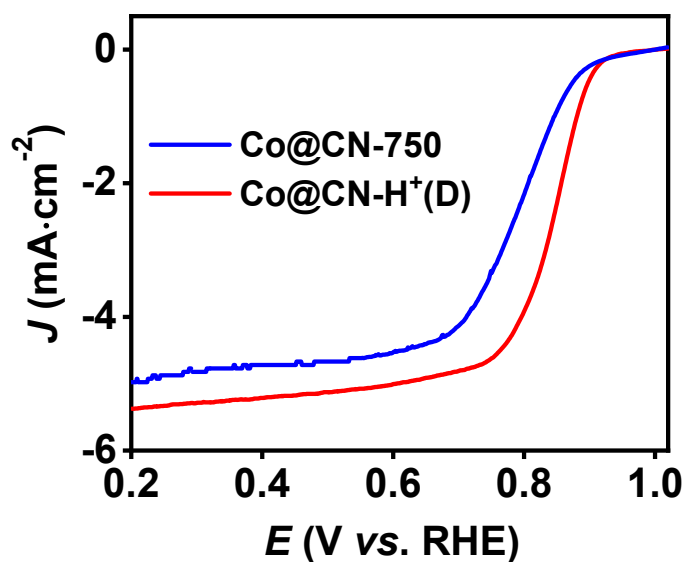

**Fig. S4.** The comparison of ORR performance of Co@CN-750 catalysts and its acid treatment products.

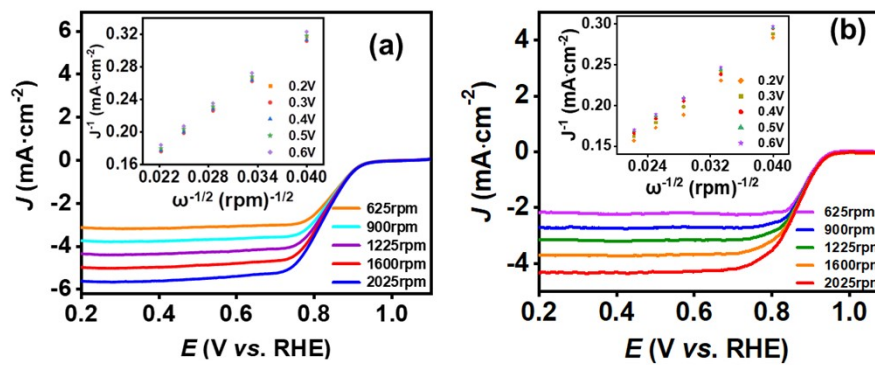

**Fig. S5.** The performances of fresh Co@CN-P<sub>10</sub>-750-H<sup>+</sup>(D) and reused Co@CN-P<sub>10</sub>-750-H<sup>+</sup>(D) catalysts after 9 h continuous i-t test.

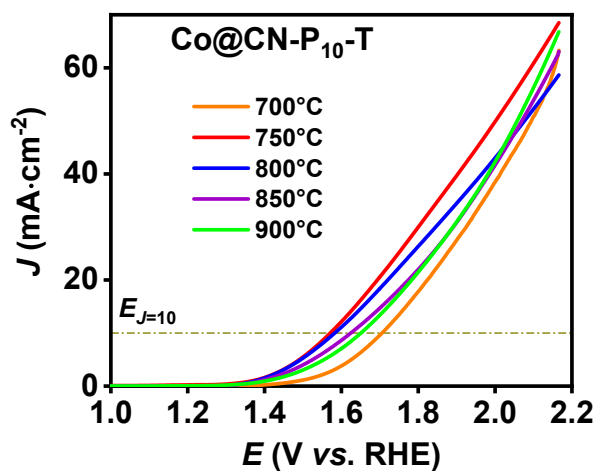

**Fig. S6.** OER performance of Co@CN-P<sub>10</sub> catalysts synthesized at different temperatures.

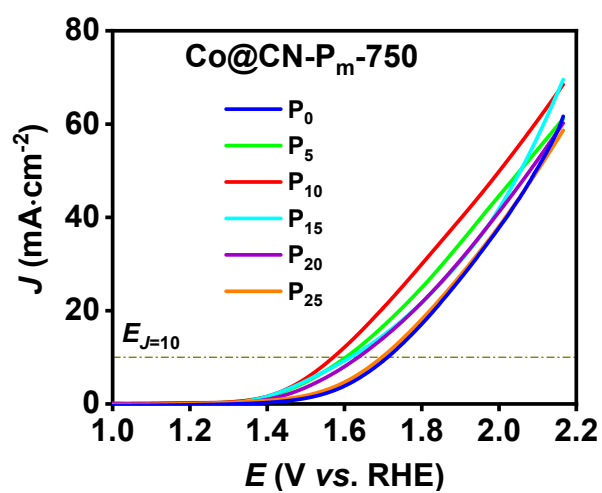

**Fig. S7.** OER performance of Co@CN-P<sub>m</sub>-750 catalysts synthesized at 750 oC with different P-content templates.

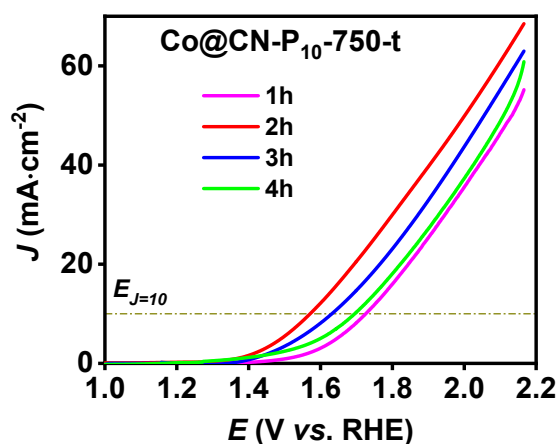

**Fig. S8.** OER performance of Co@CN-P<sub>10</sub>-750 catalysts synthesized with different calcining time.

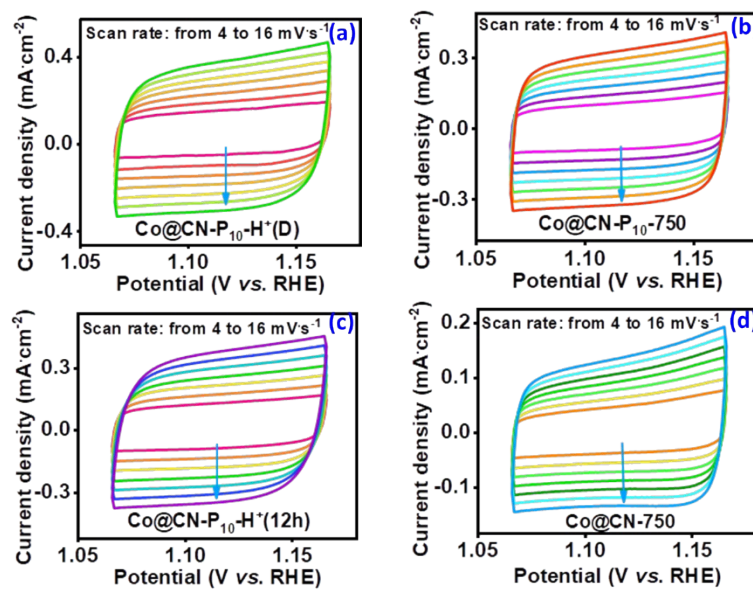

**Fig. S9.** CV curves of different catalysts. (a) Co@CN-P<sub>10</sub>-750-H<sup>+</sup>(D), (b) Co@CN-P<sub>10</sub>-750, (c) Co@CN-P<sub>10</sub>-750-H<sup>+</sup>(12h), and (d) Co@CN-750.

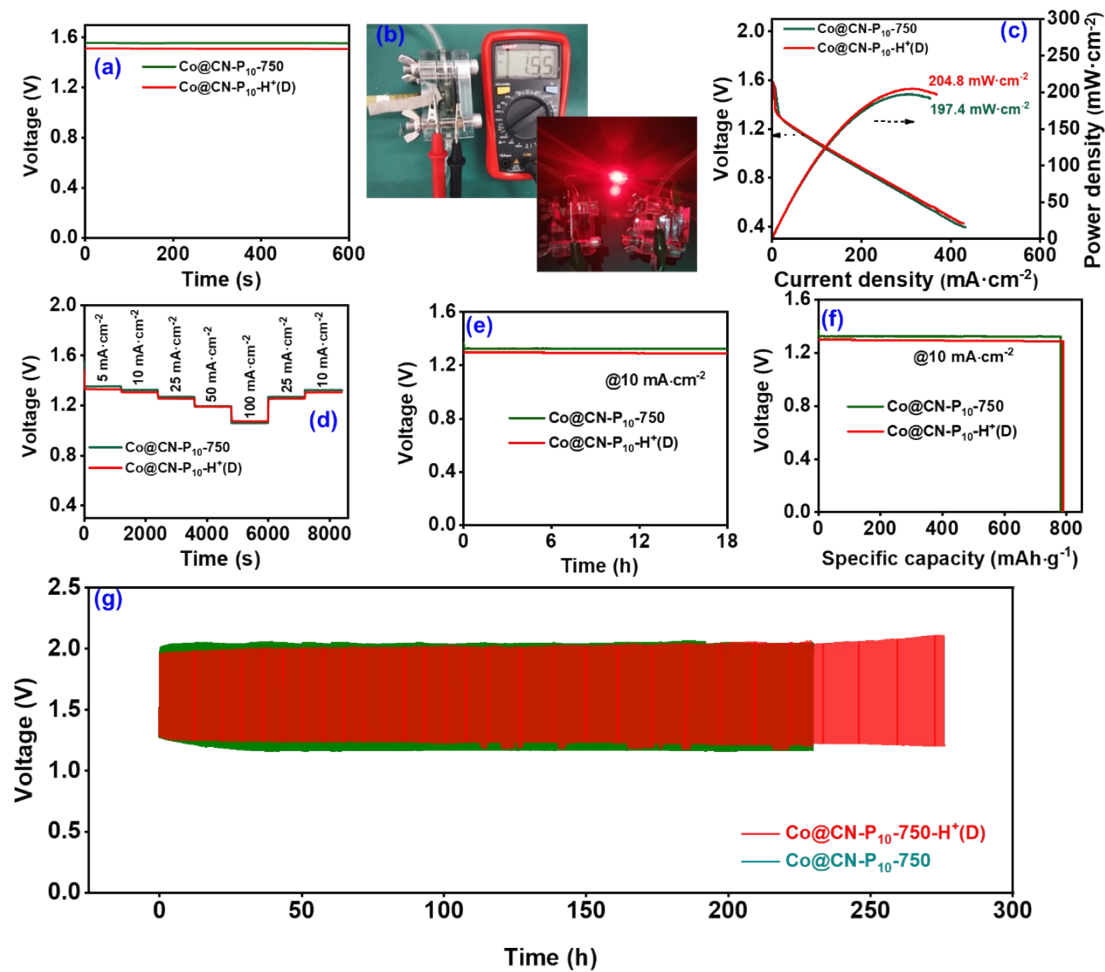

**Fig. S10.** (a) The OCV of home-made liquid ZABs assembled with different cathode catalysts, and (b) corresponding application schemes of Co@CN-P<sub>10</sub>-750 based ZABs. (c) The maximum power density of ZABs, (d) rate performances of ZABs, (e) the discharge stability of ZABs at the current density of 10 mA/cm<sup>2</sup> and corresponding specific capacity (f). (g) The long-term charge-discharge curves of ZABs at the current of 2 mA/cm<sup>2</sup> with 20 minutes per cycle, and corresponding energy efficiencies (inset).

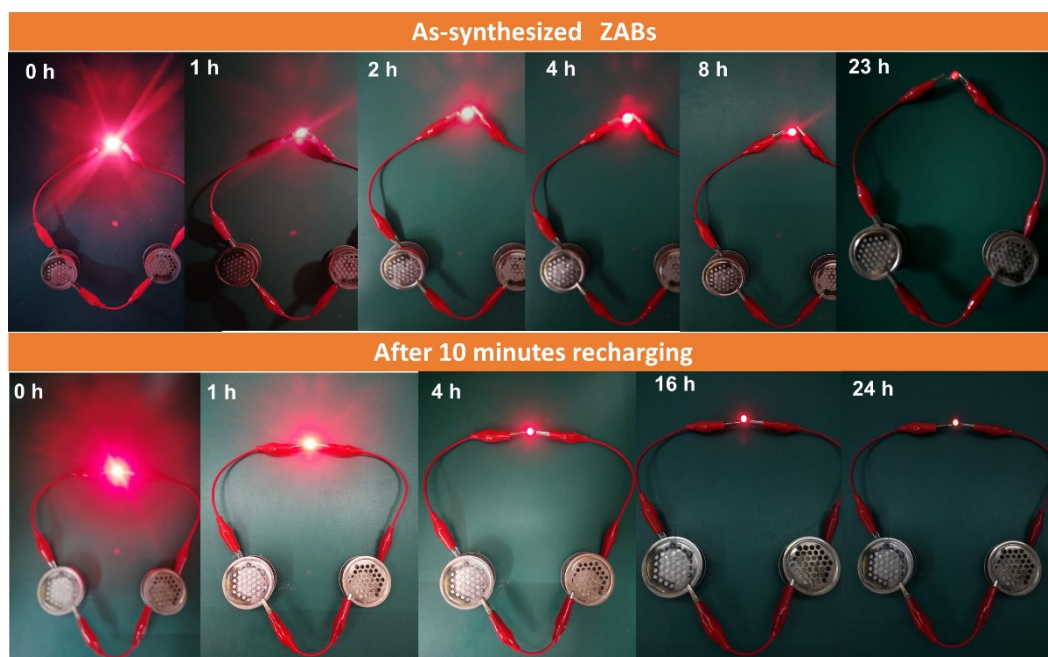

**Fig. S11.** The practical application of as-synthesized  $\text{Co@CN-P}_{10}\text{-750-H}^+(\text{D})$  based solid-state ZABs, and the application of  $\text{Co@CN-P}_{10}\text{-750-H}^+(\text{D})$  based ZABs after 10 minutes recharging at  $10 \text{ mA/cm}^2$

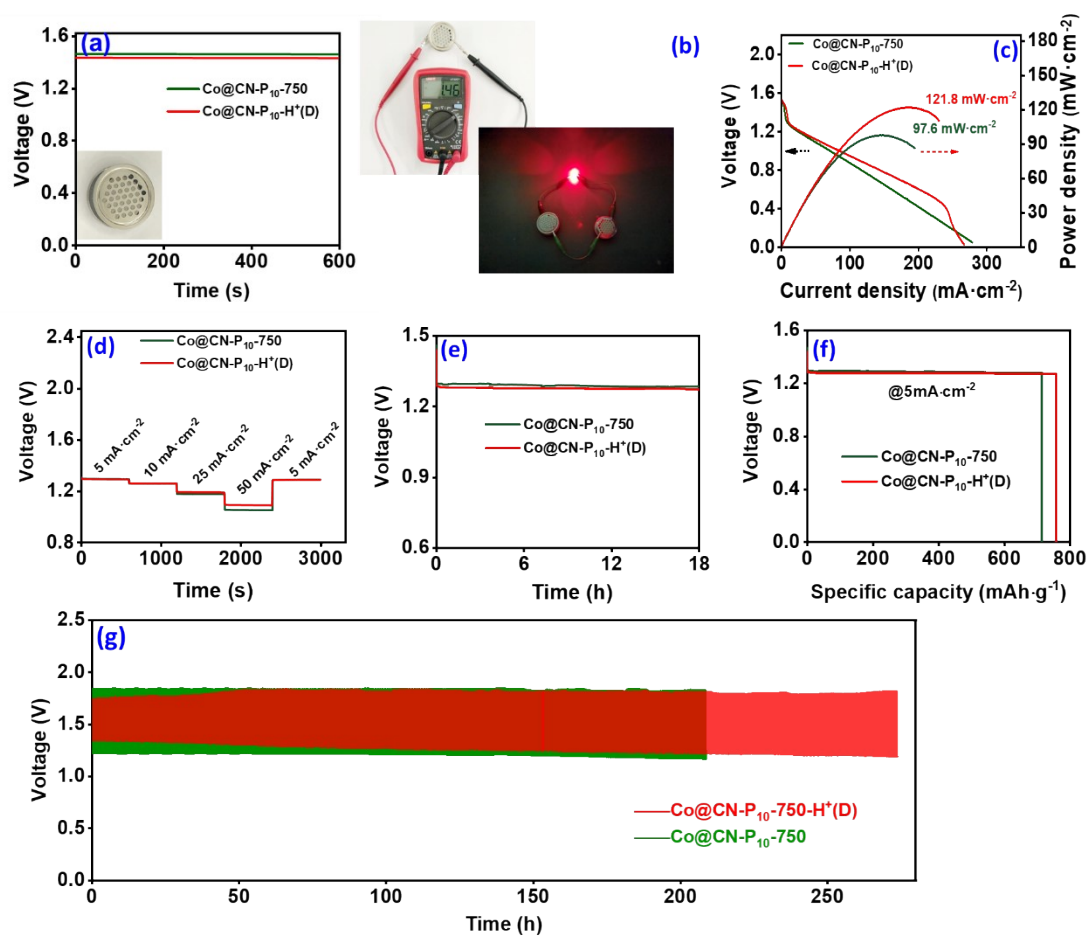

**Fig. S12.** (a) The OCV of home-made solid-state ZAB assembled with different catalysts, and (b) corresponding application images of Co@CN-P<sub>10</sub>-750 based ZAB. (c) The maximum power density of ZABs, (d) rate performances of ZABs, (e) the discharge stability of ZABs at the current density of 5 mA/cm<sup>2</sup> and corresponding specific capacity (f). (g) The long-term charge-discharge curves of ZABs at the current of 1 mA/cm<sup>2</sup> with 20 minutes per cycle, and the energy efficiencies (inset).
